1  
2  
3  
4  
5  
6  
7  
8  
9  
10  
11  
12  
13  
14  
15  
16  
17  
18  
19  
20  
21  
22  
23  
24  
25

## **Telemedicine adoption in Ecuador: an assessment of physician perceptions and knowledge towards its benefits and limitation**

Ivan Cherrez-Ojeda<sup>1-3¶\*</sup>, Emanuel Vanegas<sup>4¶</sup>, Miguel Felix<sup>5¶</sup>, María José Farfán Bajaña<sup>1,2¶</sup>, Geovanny Alvarado-Villa<sup>1¶</sup>, Hans Mautong<sup>1,2¶</sup>, Fernando Espinoza<sup>1¶</sup>, Zouina Sarfraz<sup>6&</sup>, Azza Sarfraz<sup>7&</sup>, Karla Robles-Velasco<sup>1,2&</sup>, Jack Michel<sup>8¶</sup>, Abdelilah Lahmar<sup>9¶</sup>, Luc J. I. Zimmermann<sup>10&</sup>, Antonio WD Gavilanes<sup>10,11&</sup>

<sup>1</sup> Universidad Espíritu Santo, Samborondón, Ecuador.

<sup>2</sup> Respiralab Research Group, Guayaquil, Ecuador.

<sup>3</sup> Department of Medicine Kennedy Hospital, Guayaquil, Ecuador.

<sup>4</sup> Department of Internal Medicine, New York City+Health Hospitals, Woodhull, Brooklyn, NY, USA

<sup>5</sup> Department of Internal Medicine, New York City+Health Hospitals, Lincoln, The Bronx, NY, USA

<sup>6</sup> Research & Publications, Fatima Jinnah Medical University, Lahore, Pakistan.

<sup>7</sup> Department of Pediatrics and Child Health, the Aga Khan University, Karachi, Pakistan.

<sup>8</sup> Division of Clinical and Translational Research, Larkin Community Hospital, South Miami, FL, USA.

<sup>9</sup> Medicine University Mohammed VI University Hospital, Faculty of Medicine and Pharmacy in Oujda, Oujda, Morocco.

26 <sup>10</sup> School for Oncology & Developmental Biology, University of Maastricht, Maastricht, the  
27 Netherlands.

28 <sup>11</sup> Department of Pediatrics, Maastricht University Medical Center, Maastricht, the Netherlands.

29

30 **\*Corresponding author:**

31 Email: [ivancherrez@gmail.com](mailto:ivancherrez@gmail.com) (ICO)

32

33

34

35 ¶ These authors contributed equally to this work.

36 & These authors also contributed equally to this work.

37

38

39

40

41

42

43

44

45

46

47

48

## 49 Abstract

50 Telemedicine is a growing field with the potential to improve healthcare delivery, however  
51 it is important for a proper implementation to understand how physicians perceive the benefits and  
52 limitations related to their use. With this study our aim is to assess the perceptions and knowledge  
53 of telemedicine among a sample of Ecuadorian healthcare providers. We conducted a cross-  
54 sectional online survey-based study where participants answered a 12-item survey assessing their  
55 knowledge and perceptions towards telemedicine. Demographic variables were analyzed applying  
56 descriptive statistics, and a chi-square goodness of fit test was used to assess the observed  
57 frequencies of each of the survey's queries. In total, 382 participants completed the survey with an  
58 average age of 51.3 years (SD, 11.4). Around half of participants expressed to be lowly to very  
59 lowly familiarized with telemedicine technology ( $\chi^2(4) = 88.497$ ,  $p = .000$ ). Most of them  
60 considered to a high extent that telemedicine is effective in reducing costs of patient care in  
61 hospitals (32.5%;  $n=124$ ;  $\chi^2(4) = 78.812$ ,  $p = .000$ ). Finally, 8 out 10 participants expressed that a  
62 framework should be created to prevent breaches of data confidentiality when using telemedicine  
63 ( $\chi^2(4) = 250.749$ ,  $p = .000$ ). In this study we found a considerable proportion of physicians  
64 reporting low familiarization with telemedicine despite being aware of the benefits it can bring to  
65 patient care. Breaches of data confidentially and the potential for malpractice were cited as main  
66 concerns in need of a framework to prevent them. Future studies are needed to address the  
67 perceived barriers of technology to ensure a safe and efficient use of telemedicine in the healthcare  
68 setting.

69 **Keywords:** developing countries; healthcare delivery; mobile health; telemedicine; Latin  
70 America.

## 71 Introduction

72 Telemedicine (TM) is defined as the remote clinical care of patients utilizing  
73 telecommunication technology as a substitute to face-to-face contact.(1) Its implementation can  
74 be seen across the medical field for the management of chronic lung disease, diabetes, high blood  
75 pressure, neurological disorders, dermatological conditions, oncology, and mental health problems  
76 over time.(2–5) Physicians can also benefit from telemedicine models by strengthening

77 connections between health-care professionals to improve ongoing medical education and  
78 reducing professional isolation.(2)

79 Telemedicine is expected to bring various benefits, especially to those countries where the  
80 majority of the population live in remote areas without access to basic healthcare.(6,7) It is a  
81 growing field which has the potential to improve patient care, but also has many challenges  
82 associated with its adoption and usage. For instance, some studies have found that the  
83 implementation of technology may be negatively impacted by user perceived barriers.(8,9)  
84 Furthermore, a previous systematic review identified the expenses of technology and lack of  
85 literacy as major obstacles interrupting the successful implementation of telemedicine. (8)  
86 Therefore, identifying the main barriers among patients and healthcare providers is a key step for  
87 successful implementation of technology that needs to be addressed with additional studies.

88 Notably, the perceptions and knowledge concerning telemedicine vary among healthcare  
89 providers, with beliefs differing between users and non-users.(10) Factors including lack of  
90 technical expertise, and insufficient integration of data for continuity of care are notable barriers  
91 between clinicians and telemedicine.(11) As previously described it can lead to a situation in which  
92 despite widespread use of availability of telemedicine, the limited knowledge of clinicians  
93 regarding these technologies could potentially lead to underutilization of the resources.(12)  
94 Consequently, we have designed this study to assess the perceptions and knowledge of  
95 telemedicine among a sample of Ecuadorian healthcare providers (HCPs).

## 96 **Methods**

### 97 **Study design and participants**

98 We conducted a cross-sectional online survey-based study using a non-probability,  
99 snowball-sampling method where recruited participants provided referrals to recruit other HCPs.  
100 The sample comprised HCPs working in Ecuador with an active medical practice. The participants  
101 anonymously responded the 12-item survey using a Likert-scale.

### 102 **Questionnaire**

103 For this cross-sectional study, the questionnaire by Ayatollahi *et al.* was previously adapted  
104 and validated for its use in the Ecuadorian HCPs population. (12,13) The survey consisted of two  
105 parts. The first part included the demographic information of participants (age, gender, higher  
106 education degree, medical specialty, and work experience). The second part of the survey included  
107 4 domains where participants described their knowledge and perceptions about TM as follows:

- 108 1. Knowledge about Telemedicine (KAT): Q<sub>1</sub>-Q<sub>3</sub>
- 109 2. Perception of the Utility of Telemedicine (PUT): Q<sub>4</sub>-Q<sub>6</sub>
- 110 3. Perception of the Disadvantages of Telemedicine (PDT): Q<sub>7</sub>-Q<sub>9</sub>
- 111 4. Knowledge of the Security of Telemedicine (KST): Q<sub>10</sub>-Q<sub>12</sub>.

112 Each domain had 3 questions, for a total of 12 questions. Each question was answered  
113 based on a five-point Likert scale that ranged from very low (1) to very high (5). Each of the  
114 questions in the survey according to their domains can be visualized in the **S1 Table**.

## 115 **Statistical analysis**

116 The present study reports demographic characteristics applying descriptive statistics.  
117 Nominal variables are presented as frequencies and percentages, while normally distributed  
118 continuous data is summarized through means and standard deviations. For the purposes of  
119 analysis, the 5-point Likert scale was used as a categorical variable, as a chi-square goodness of  
120 fit test was used to assess if the observed frequencies of each of the survey's queries responses  
121 were as expected by chance or not. In case of assumption violation, a Fisher's exact test was  
122 applied. All statistical analyses were performed using SPSS for Windows (version 25.0; SPSS Inc,  
123 Chicago, Illinois). Statistical significance was considered as  $p < 0.05$ .

## 124 **Ethical considerations**

125 This study was approved by "Comité de ética e Investigación en Seres Humanos" (CEISH),  
126 ethical review board, Kennedy Hospital, Guayaquil-Ecuador (#HCK-CEISH-18-0060).  
127 Additionally, as per the Declaration of Helsinki, written informed consent was obtained from all  
128 participants.

## 129 **Results**

## 130 **Descriptive statistics of demographics**

131 In total, 382 participants completed the survey, with a response rate of 95%. The average  
132 age of the sample was 51.3 years (SD, 11.4); 58.6% were males. While 82.5% (n=315) of the  
133 participants had a specialty, only one in ten (10.2%; n=39) had a higher education degree.  
134 Regarding specialties, pediatrics (28.0%; n=107) and traumatology (13.1%, n= 50) were the most  
135 common. More than half (53.4%, n=204) of the participants had more than 20 years of work  
136 experience. Demographic characteristics are best summarized in **Table 1**.

137 **Table 1: Demographic and clinical information of surveyed population (n=382).**

138

| Characteristics         | Value % (n) |
|-------------------------|-------------|
| Age (mean, SD)          | 51.3 (11.4) |
| Gender                  |             |
| Male                    | 58.6 (224)  |
| Female                  | 41.4 (158)  |
| Higher education degree | 10.2 (39)   |
| Master's degree         | 5.2 (20)    |
| Doctorate degree        | 5.0 (19)    |
| Medical specialty       | 82.5 (315)  |
| Pediatrics              | 28.0 (107)  |
| General medicine        | 17.5 (67)   |
| Traumatology            | 13.1 (50)   |
| Gastroenterology        | 6.8 (26)    |
| Allergy                 | 5.2 (20)    |
| Gynecology              | 3.7 (14)    |
| Dermatology             | 3.4 (13)    |
| Critical care           | 2.6 (10)    |
| Other                   | 19.6 (75)   |
| Work experience (years) |             |
| 1-5 years               | 9.2 (35)    |

|             |            |
|-------------|------------|
| 5-10 years  | 10.5 (40)  |
| 11-15 years | 13.1 (50)  |
| >20 years   | 53.4 (204) |

139

## 140 Knowledge about telemedicine

141 Around half of participants expressed to be lowly to very lowly familiarized with  
142 telemedicine technology ( $\chi^2(4) = 88.497, p = .000$ ), its application in medicine ( $\chi^2(4) =$   
143  $102.188, p = .000$ ) and telemedicine tools ( $\chi^2(4) = 106.874, p = .000$ ) (Fig 1, S1 Table). Roughly  
144 3 out of 10 patients had an average familiarity with such topics while only around 20% were  
145 highly to very highly familiarized.

146 **Fig 1. Proportions of categories expressing the extent to which participants asserted the**  
147 **influence of telemedicine on each of the questions encompassed by each domain.** Q1, “To  
148 what extent are you familiar with telemedicine technology?”; Q2, “To what extent are you familiar  
149 with the medical applications of telemedicine technology?”; Q3, “To what extent are you familiar  
150 with telemedicine tools?”; Q4, “In your opinion, to what extent is telemedicine effective in  
151 reducing the costs of patient care in hospitals?”; Q5, “In your opinion, to what extent does  
152 telemedicine technology save clinicians’ time?”; Q6, “In your opinion, to what extent does  
153 telemedicine technology provide faster and better medical care?”; Q7, “In your opinion, to what  
154 extent does telemedicine technology endanger patient privacy?”; Q8, “In your opinion, to what  
155 extent does telemedicine technology reduce the efficiency of patient care?”; Q9, “In your opinion,  
156 to what extent may telemedicine technology increase malpractice in healthcare?”; Q10, “To what  
157 extent should a framework be created to prevent breaching data confidentiality when using  
158 telemedicine?”; Q11, “To what extent does telemedicine technology require legal clarification for  
159 patients?”; Q12, “To what extent does telemedicine technology require a formulated and clear  
160 framework for access to medical information?”.

## 161 Perception of the utility of telemedicine

162 Most of the participants (32.5%;  $n=124$ ;  $\chi^2(4) = 78.812, p = .000$ ) considered, to a high  
163 extent, that telemedicine is effective in reducing costs of patient care in hospitals. However, most  
164 participants also alleged that telemedicine technology can save an average amount of clinicians’

165 time (35.6%, n=136;  $\chi^2(4) = 80.277, p = .000$ ) or provide, to an average extent, a faster and better  
166 medical care (34.3%, n=131;  $\chi^2(4) = 99.571, p = .000$ ) (**Fig 1, S1 Table**).

## 167 **Perception of the disadvantages of telemedicine**

168 Even though most participants reported that telemedicine technology may endanger patient  
169 privacy either to a very low (24.6%, n=94) or low (24.3%, n=93) extent ( $\chi^2(4) = 32.555, p = .000$ ),  
170 most participants considered that it can highly increase malpractice in healthcare (27.0%, n=103;  
171  $\chi^2(4) = 31.534, p = .000$ ) (**Fig 1, S1 Table**). Also, 27.7% (n=106) expressed that telemedicine  
172 technology reduces the efficiency of patient care in an average extent while 24.3% (n=93)  
173 considered this statement to a high extent ( $\chi^2(4) = 31.534, p = .000$ ).

## 174 **Knowledge of the security of telemedicine**

175 About 8 out of 10 participants expressed that, from a high to a very high extent, a  
176 framework should be created to prevent breaches of data confidentiality when using telemedicine  
177 ( $\chi^2(4) = 250.749, p = .000$ ), that telemedicine requires legal clarification for patients ( $\chi^2(4) =$   
178  $263.628, p = .000$ ) and that telemedicine technology requires a formulated and clear framework  
179 for access to medical information ( $\chi^2(4) = 240.670, p = .000$ ) (**Fig 1, S1 Table**).

## 180 **Discussion**

181 Telemedicine is a growing field with the potential to improve healthcare delivery, however  
182 it is important for a proper implementation to understand how physicians and patients perceive the  
183 benefits and limitations related to their use. In our study we found that roughly half of participants  
184 expressed a low familiarization with telemedicine technologies and its application in medicine.  
185 This finding contrast with a previous study among physicians in Saudi Arabia, in which around  
186 46.1% reported average knowledge about telemedicine.(14) It is possible that organizational  
187 structure and culture affect health care providers' perceptions of telemedicine based on the  
188 diffusion of innovation theory.(15) According to this theory, the key to adoption is that individuals  
189 must perceive the idea as “innovative” to enable greater diffusion. This is one area where a change  
190 in healthcare organizations’ s culture and structure may be able to affect health care providers'  
191 perceptions of telemedicine.(16)



192 Despite the low familiarization with telemedicine among physicians in our study, most of  
193 them considered to a high extent that it can be effective in reducing the costs related to patient care  
194 in hospitals, save a considerable amount of clinician's time, and provide faster and better medical  
195 care. Similarly, a previous study among physicians in Indonesia found that most respondents  
196 considered that telemedicine is beneficial for patients (89%) and were interested in its continued  
197 use (88%).(17) Previous studies have shown that telemedicine can be particularly useful for  
198 patients with chronic diseases.(18) For instance, Nguyen and colleagues reported that after taking  
199 into consideration all costs and effects of a telemedicine-based national diabetic screening program  
200 in Singapore, it would still had significantly lower costs while generating similar quality-adjusted  
201 life-years compared to a physician-based model.(19) In a randomized control trial from Japan  
202 authors found that the use of a mobile application was a cost-effective tool that might help to  
203 reduce the incidence of dysmenorrhea and depression among women, and interestingly enough  
204 most participants were willing or relatively willing to use it.(20)

205 Despite its benefits, there are several aspects of telemedicine inherent to its nature such as  
206 security and privacy concerns, and the danger to affect patient privacy or incur in malpractice. In  
207 our study 4 out 10 respondents considered to a low extent that telemedicine may endanger patient  
208 privacy, however a similar proportion stated that it may increase malpractice cases. Additionally,  
209 8 out of 10 participants in our survey expressed that a framework should be created to access  
210 medical information and prevent breaches of data confidentially when using telemedicine. These  
211 interesting findings may be the related to the fact that as of today, mobile technologies not only  
212 manage personal data but also highly personal information including social interactions and  
213 emotions, creating new issues such as the appropriateness of physicians to communicate with  
214 patients through platforms outside of the electronic medical record.(20) This represents an obstacle  
215 that needs to be addressed by healthcare organizations and providers to ensure that sensitive  
216 information is only shared among authorized individuals.(21,22)

217 Prior studies have determined that there is a growing interest in the use and application of  
218 telemedicine in the clinical practice, but there are still barriers ranging from the availability of  
219 internet and mobile devices to limitations of physical assessments, and even resistance to change  
220 that can affect the experience and satisfaction of using technology on a case-by-case basis.(23,24)  
221 As of today, telemedicine represents a primary means of expanding care to those with limited

222 access to physicians, but to be truly patient centered it must also be affordable and accessible.(25)  
223 Considering the perceptions and knowledge of physicians related to telemedicine is also essential  
224 to design more efficient and easier to use tools that ultimately will increase the participation in  
225 these new technologies.(8)

## 226 **Limitations**

227 In light of our findings there are several limitations worth mentioning. Nearly one third of  
228 our sample consisted of pediatricians, while a sixth of it was composed of traumatologists, which  
229 may limit the generalizability of our results to physicians with other specialties. Around half of the  
230 participants were unfamiliar with telemedicine, which may lead to biased answers when asked  
231 questions about topics requiring more in-depth knowledge of these technologies. However, to the  
232 best of our knowledge our study is among the first to assess the perceptions of telemedicine among  
233 Ecuadorian physicians, providing valuable insights that might be useful to design future  
234 interventions.

## 235 **Conclusion**

236 Understanding physician's perceptions to the use of technology is an important step for  
237 identifying unmet needs and areas of improvement. In this study we found a considerable  
238 proportion of physicians reporting low familiarization with telemedicine despite being aware of  
239 the benefits it can bring to patient care. Breaches of data confidentiality and the potential for  
240 malpractice were cited as main concerns in need of a framework to prevent them. Future studies  
241 are needed to address the perceived barriers of technology to ensure a safe and efficient use of  
242 telemedicine in the healthcare setting.

## 243 **Acknowledgments**

244 The authors acknowledge the guidance and knowledge imparted by the MECOR Program,  
245 especially Sonia Buist and Ana Menezes, for this study. Special thanks to all members of  
246 Respiralab Research Group in particular Dr. Christian Kuon Yeng for their initial input regarding  
247 this project. We want to also express our gratitude to Dr. Krunal Pandav (Larkin Health System,  
248 South Miami, FL, USA) for his early contributions in manuscript preparation. Finally, we want to

249 express our gratitude to Universidad Espiritu Santo for their continuous support in our research  
250 endeavors.

251

252

253

254

255

256

257

258

259

260

261

262

263

264

265

266

267

268

269

270

271

272

273

274

275

276

277

## 278 **References**

- 279 1. Bashshur RL. On the definition and evaluation of telemedicine. *Telemed J.* 1995;1(1):19-30.
- 280 2. Pourmand A, Ghassemi M, Sumon K, Amini SB, Hood C, Sikka N. Lack of telemedicine  
281 training in academic medicine: are we preparing the next generation? *Telemed E-Health.*  
282 2021;27(1):62-7.
- 283 3. Dorsey ER, Glidden AM, Holloway MR, Birbeck GL, Schwamm LH. Teleneurology and  
284 mobile technologies: the future of neurological care. *Nat Rev Neurol.* 2018;14(5):285-97.
- 285 4. Hazin R, Qaddoumi I. Teleoncology: current and future applications for improving cancer  
286 care globally. *Lancet Oncol.* 2010;11(2):204-10.
- 287 5. Lee JJ, English JC. Teledermatology: a review and update. *Am J Clin Dermatol.*  
288 2018;19(2):253-60.
- 289 6. Ibrahim MIM, Phing C, Palaian S. Evaluation of knowledge and perception of Malaysian  
290 health professionals about telemedicine. *J Clin Diagn Res.* 2010;4:2052-7.
- 291 7. Sharma LK, Rajput M. Telemedicine: socio-ethical considerations in the Indian milieu. *Med*  
292 *Leg J.* 2009;77(2):61-5.
- 293 8. Scott Kruse C, Karem P, Shifflett K, Vegi L, Ravi K, Brooks M. Evaluating barriers to  
294 adopting telemedicine worldwide: a systematic review. *J Telemed Telecare.* 2018;24(1):4-  
295 12.
- 296 9. Portnoy J, Waller M, Elliott T. Telemedicine in the era of COVID-19. *J Allergy Clin*  
297 *Immunol Pract.* 2020;8(5):1489-91.
- 298 10. Barton PL, Brega AG, Devore PA, Mueller K, Paulich MJ, Floersch NR, et al. Specialist  
299 Physicians' Knowledge and Beliefs about Telemedicine: A Comparison of Users and  
300 Nonusers of the Technology. *Telemed E-Health.* octubre de 2007;13(5):487-500.
- 301 11. Scott Kruse C, Karem P, Shifflett K, Vegi L, Ravi K, Brooks M. Evaluating barriers to  
302 adopting telemedicine worldwide: A systematic review. *J Telemed Telecare.* 2016/10/16 ed.  
303 enero de 2018;24(1):4-12.
- 304 12. Ayatollahi H, Sarabi FZP, Langarizadeh M. Clinicians' Knowledge and Perception of  
305 Telemedicine Technology. *Perspect Health Inf Manag.* noviembre de 2015;12(Fall):1c-1c.
- 306 13. Alvarado-Villa G, KuonYeng-Escalante C, Sagñay-Pinilla N, Vera Paz C, Cherrez-Ojeda I.  
307 Perceptions and knowledge of telemedicine in Ecuadorian practicing physicians: an  
308 instrument adaptation, validation and translation from English to Spanish. *BMC Public*  
309 *Health.* 2021;21(1):1-9.

- 310 14. Albarrak AI, Mohammed R, Almarshoud N, Almujaali L, Aljaeed R, Altuwaijiri S, et al.  
311 Assessment of physician's knowledge, perception and willingness of telemedicine in Riyadh  
312 region, Saudi Arabia. *J Infect Public Health*. 2021;14(1):97-102.
- 313 15. Walker J, Whetton S. The diffusion of innovation: factors influencing the uptake of  
314 telehealth. *J Telemed Telecare*. 2002;8(3\_suppl):73-5.
- 315 16. Schinasi DA, Foster CC, Bohling MK, Barrera L, Macy ML. Attitudes and Perceptions of  
316 Telemedicine in Response to the COVID-19 Pandemic: A Survey of Naïve Healthcare  
317 Providers. *Front Pediatr*. 2021;9:257.
- 318 17. Indria D, Alajlani M, Fraser HS. Clinicians perceptions of a telemedicine system: a mixed  
319 method study of Makassar City, Indonesia. *BMC Med Inform Decis Mak*. 2020;20(1):1-8.
- 320 18. Salsabilla A, Azzahra AB, Syafitri RI, Supadmi W, Suwantika AA. Cost-Effectiveness of  
321 Telemedicine in Asia: A Scoping Review. *J Multidiscip Healthc*. 2021;14:3587.
- 322 19. Nguyen HV, Tan GSW, Tapp RJ, Mital S, Ting DSW, Wong HT, et al. Cost-effectiveness of  
323 a national telemedicine diabetic retinopathy screening program in Singapore.  
324 *Ophthalmology*. 2016;123(12):2571-80.
- 325 20. Song M, Kanaoka H. Effectiveness of mobile application for menstrual management of  
326 working women in Japan: Randomized controlled trial and medical economic evaluation. *J*  
327 *Med Econ*. 2018;21(11):1131-8.
- 328 21. Qidwai W. Advances in information and communication technology (ICT): issues,  
329 challenges and opportunities for health care professionals. 2011;
- 330 22. Cherrez-Ojeda I, Vanegas E, Felix M, Mata VL, Jiménez FM, Sanchez M, et al. Frequency  
331 of Use, Perceptions and Barriers of Information and Communication Technologies Among  
332 Latin American Physicians: An Ecuadorian Cross-Sectional Study. *J Multidiscip Healthc*.  
333 2020;13:259.
- 334 23. Ahmed T, Baig M, Bashir M, Gazzaz Z, Butt N, Khan S. Knowledge, attitudes, and  
335 perceptions related to telemedicine among young doctors and nursing staff at the King  
336 Abdul-Aziz University Hospital Jeddah, KSA. *Niger J Clin Pr*. 2021;4:464-9.
- 337 24. Rego N, Pereira HS, Crispim J. Perceptions of Patients and Physicians on Teleconsultation at  
338 Home for Diabetes Mellitus: Survey Study. *JMIR Hum Factors*. 2021;8(4):e27873.
- 339 25. Boxer RJ, Ellimoottil C. Advantages and utilization of telemedicine. *Mhealth*. 2019;5.
- 340
- 341
- 342

## 343 **Supporting information**

344 **S1 Table. Percentages and frequencies of categories that indicate the extent to which**  
345 **participants asserted the influence of telemedicine on each of the topics covered by each**  
346 **domain.** All data are presented as percentages and frequencies. Differences in values between  
347 the five “extent” groups are significant at .05 significance level.

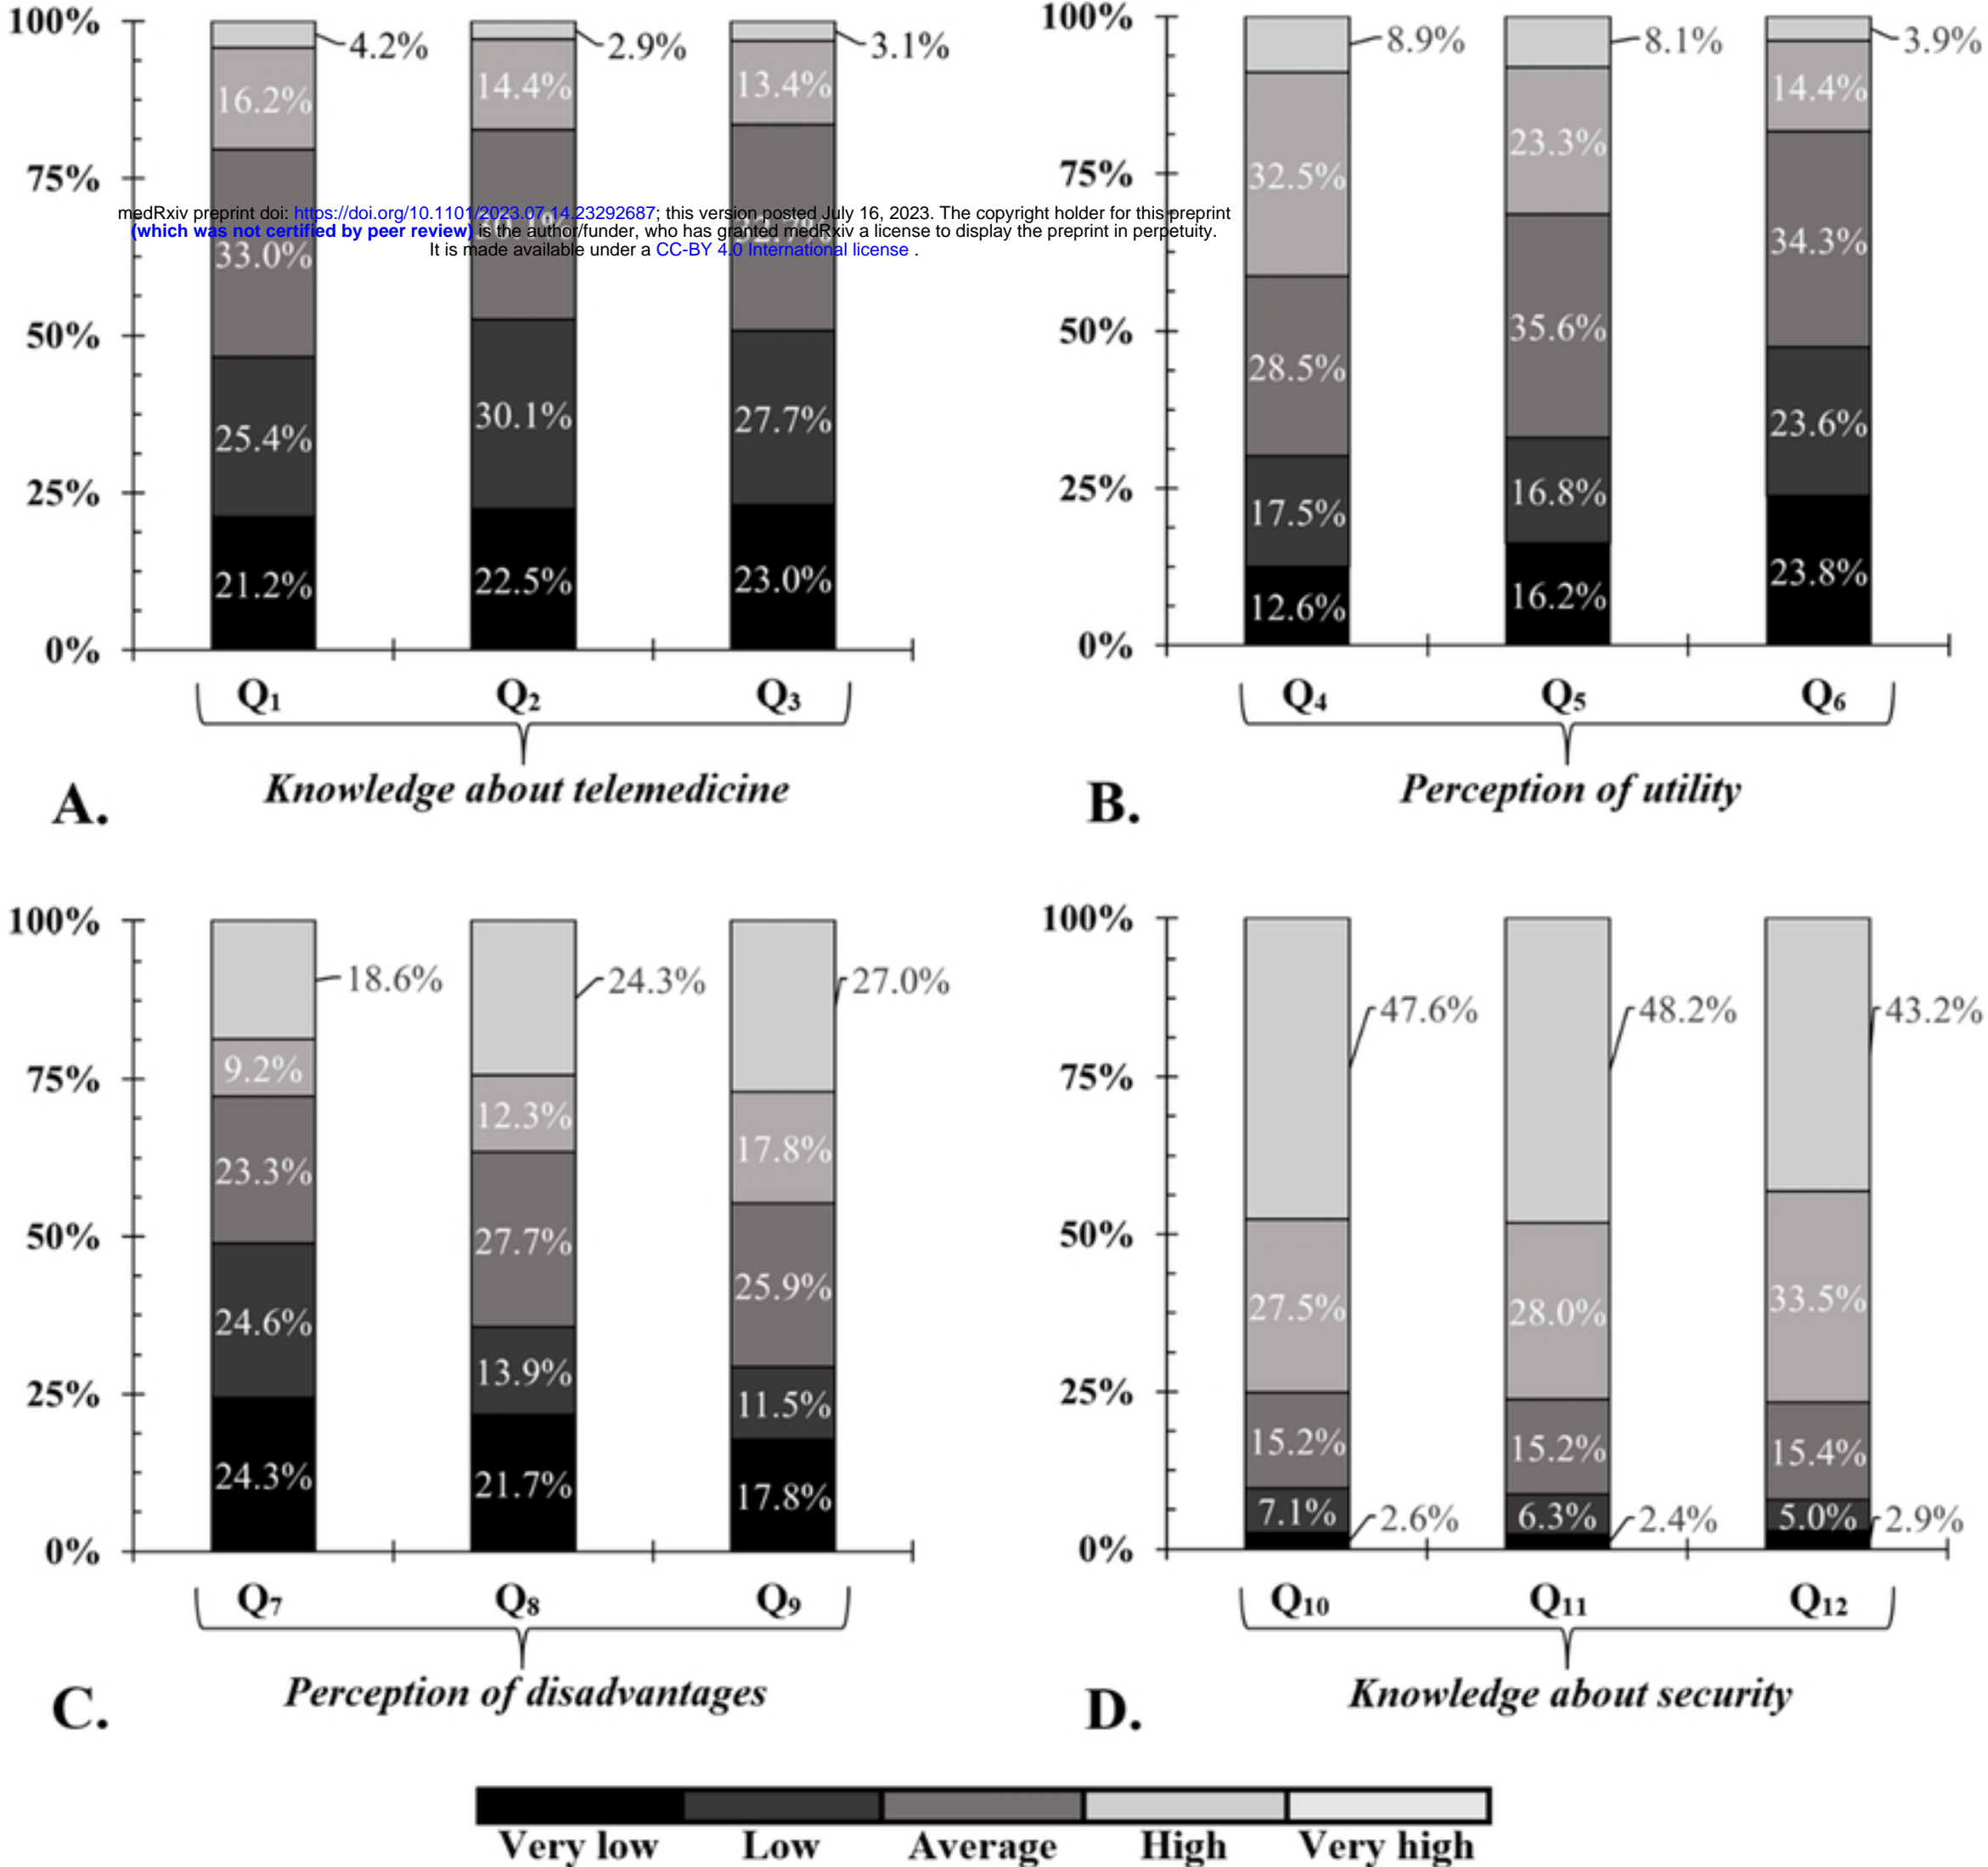

Fig 1
